# Supplementary material
Source: PubMed Central journal article supplement (PMC10011746)
Supplement: mmc2.pdf [file mmc2.pdf]

## Article Transfer Service - We are sending your submission to an alternative journal

choose-alternative-journals@elsevier.com <choose-alternative-journals@elsevier.com>

Dj. 16/6/2022 10:35

Per a: Sandra Parra Pérez <sandra.parra@urv.cat>

Dear Dr. Parra,

Regarding your manuscript: Low HDL-c levels at admission are associated with greater severity and worse clinical outcomes in patients with COVID-19 disease.

We will now contact the next alternative journal 'Atherosclerosis Plus', as you instructed, to see if the editor will be interested in having your submission transferred.

If you wish to be withdrawn from the process please contact support  
<https://service.elsevier.com/app/home/supporthub/publishing/>

Manuscript status page: <https://authors.elsevier.com/choose-alternative-journals/submissions/66dcc821-8b75-51c3-b134-60c3301ff3e8>

Sincerely,  
The Elsevier ATS team
